# Supplementary material for: Association of mesothelioma deaths with cumulated neighborhood exposures due to a large-scale asbestos cement plant in Amagasaki City, Japan: A nested case-control study
Source: Research Square preprint supplement (doi:10.21203/rs.3.rs-574038/v2), 2022-05-26
Supplement: Supplementary file 1 [file 53590e758ff347a30202a913.xlsx]

## Sheet: Table 1.
	Table 1. Demographics of cases and controls (n = 536) for malse and females who participated in the nested case-control study in Amagasaki City, Japan.
			Male												Female
			Cases					Controls					P-valued		Cases					Controls					P-valued
			n		(%)			n		(%)					n		(%)			n		(%)
	Subjects		84	(	100	)		262	(	100	)				49	(	100	)		141	(	100	)
	Respondents for the questionnaires												<0.001												<0.001
		Subject (Case/Control)	6	(	7.14286	)		183	(	69.8473	)				2	(	4.08163	)		73	(	51.773	)
		Spouse	55	(	65.4762	)		43	(	16.4122	)				10	(	20.4082	)		19	(	13.4752	)
		Child	19	(	22.619	)		34	(	12.9771	)				36	(	73.4694	)		42	(	29.7872	)
		Grandchild	0	(	0	)		0	(	0	)				0	(	0	)		1	(	0.70922	)
		Other relatives	3	(	3.57143	)		2	(	0.763359	)				0	(	0	)		6	(	4.25532	)
		Unknown	1	(	1.19048	)		0	(	0	)				1	(	2.04082	)		0	(	0	)
	Age group at death,a y												0.956												0.859
		40-49	1	(	1.19048	)		3	(	1.14504	)				0	(	0	)		0	(	0	)
		50-59	3	(	3.57143	)		9	(	3.43511	)				3	(	6.12245	)		14	(	9.92908	)
		60-69	25	(	29.7619	)		89	(	33.9695	)				9	(	18.3673	)		30	(	21.2766	)
		70-79	43	(	51.1905	)		127	(	48.4733	)				20	(	40.8163	)		52	(	36.8794	)
		≥80	12	(	14.2857	)		34	(	12.9771	)				17	(	34.6939	)		45	(	31.9149	)
	Asbestos exposure
		Definiteb	26	(	30.9524	)		59	(	22.5191	)		0.145		6	(	12.2449	)		2	(	1.41844	)		0.004
		Non-definitec	58	(	69.0476	)		203	(	77.4809	)				43	(	87.7551	)		139	(	98.5816	)
	a	Age at death of each corresponding case for controls.
	b	Subjects who answered "Yes" to the question "Have you ever handled asbestos products directly?"
	c	Subjects who answered "No" or "Unknown" to the question "Have you ever handled asbestos products directly?"
	d	Fisher's exact test.
