# Supplementary material for: Association of mesothelioma deaths with cumulated neighborhood exposures due to a large-scale asbestos cement plant in Amagasaki City, Japan: A nested case-control study
Source: Research Square preprint supplement (doi:10.21203/rs.3.rs-574038/v2), 2022-05-26
Supplement: Supplementary file 2 [file e5809c931611761a51313f17.xlsx]

## Sheet: Table 2.
	Table 2. Exposure categories and number of residences between 1957 and 1975 among non-definite asbestos exosures (n=443).
	Non-definite asbestos exposures				Male												Female
					Cases					Controls					P-value		Cases					Controls					P-value
					N		(%)			N		(%)					N		(%)			N		(%)
	Number of subjects				58	(	100	)		203	(	100	)				43	(	100	)		139	(	100	)
	Occupational asbestos exposure														<0.001a												<0.001a
			None		22	(	37.931	)		134	(	66.0099	)				23	(	53.4884	)		115	(	82.7338	)
			Possible		18	(	31.0345	)		50	(	24.6305	)				18	(	41.8605	)		22	(	15.8273	)
			Convincing		18	(	31.0345	)		19	(	9.35961	)				2	(	4.65116	)		2	(	1.43885	)
	Domestic asbestos exposure														0.049a												0.395a
			None		56	(	96.5517	)		203	(	100	)				40	(	93.0233	)		134	(	96.4029	)
			Yes		2	(	3.44828	)		0	(	0	)				3	(	6.97674	)		5	(	3.59712	)
	Household asbestos exposure														0.246a												1.000a
			None		52	(	89.6552	)		191	(	94.0887	)				40	(	93.0233	)		127	(	91.3669	)
			Yes		6	(	10.3448	)		12	(	5.91133	)				3	(	6.97674	)		12	(	8.63309	)
	Number of residences, total				106					310							81					208
	Number of residences per person, median (range)				2 (1-5)					2 (1-5)					0.023b		2 (1-5)					2 (1-4)					0.029b
	Number of residences per person, category
			1		28	(	48.2759	)		125	(	61.5764	)		0.021a		20	(	46.5116	)		87	(	62.5899	)		0.042a
			2		14	(	24.1379	)		54	(	26.601	)				13	(	30.2326	)		37	(	26.6187	)
			3		15	(	25.8621	)		20	(	9.85222	)				6	(	13.9535	)		13	(	9.35252	)
			≥4		1	(	1.72414	)		4	(	1.97044	)				4	(	9.30233	)		2	(	1.43885	)
	a	Fisher's exact test.
	b	Wilcoxon's rank-sum test.
